# Supplementary material for: Effectiveness of the EMPOWER-PAR Intervention in Improving Clinical Outcomes of Type 2 Diabetes Mellitus in Primary Care: A Pragmatic Cluster Randomised Controlled Trial
Source: Springer Nature journal article supplement (doi:10.1186/s12875-016-0557-1), 2016-11-14
Supplement: MOESM1 [file 11044682]

| Clinic No. | Number of T2DM patients in the registry (eligible to enroll > 500) | FMS was willing to participate and lead the intervention | Capacity to implement the obligatory component of EMPOWER-PAR intervention |                                          |                                | Distance to the central laboratory (in km) | Eligibility to participate |
|------------|--------------------------------------------------------------------|----------------------------------------------------------|----------------------------------------------------------------------------|------------------------------------------|--------------------------------|--------------------------------------------|----------------------------|
|            |                                                                    |                                                          | Delivery System Design: Multi-Disciplinary Team                            | Self-Management Support: Training & Tool | Decision Support: CPG Training |                                            |                            |
| 1          | 1800                                                               | Yes                                                      | Yes                                                                        | Yes                                      | Yes                            | 55                                         | √                          |
| 2          | 550                                                                | Yes                                                      | Yes                                                                        | Yes                                      | Yes                            | 39                                         | √                          |
| 3          | 2480                                                               | Unsure                                                   | No                                                                         | Yes                                      | Yes                            | 50                                         | x                          |
| 4          | 2114                                                               | Yes                                                      | Yes                                                                        | Yes                                      | Yes                            | 34                                         | √                          |
| 5          | 2000                                                               | Yes                                                      | Yes                                                                        | Yes                                      | Yes                            | 28                                         | √                          |
| 6          | 2060                                                               | Yes                                                      | Yes                                                                        | Yes                                      | Yes                            | 34                                         | √                          |
| 7          | 850                                                                | Unsure                                                   | No                                                                         | No                                       | No                             | 31                                         | x                          |
| 8          | 2639                                                               | Yes                                                      | Yes                                                                        | Yes                                      | Yes                            | 23                                         | √                          |
| 9          | 2400                                                               | Unsure                                                   | No                                                                         | No                                       | Yes                            | 12                                         | x                          |
| 10         | 1500                                                               | No                                                       | Yes                                                                        | Yes                                      | Yes                            | 33                                         | x                          |
| 11         | 1500                                                               | Yes                                                      | Yes                                                                        | Yes                                      | Yes                            | 35                                         | √                          |
| 12         | 3000                                                               | Unsure                                                   | No                                                                         | No                                       | Yes                            | 29                                         | x                          |
| 13         | 4900                                                               | No                                                       | Yes                                                                        | Yes                                      | Yes                            | 20                                         | x                          |
| 14         | 2000                                                               | Yes                                                      | Yes                                                                        | Yes                                      | Yes                            | 26                                         | √                          |
| 15         | 4400                                                               | Yes                                                      | Yes                                                                        | Yes                                      | Yes                            | 4                                          | √                          |
| 16         | 1878                                                               | Yes                                                      | Yes                                                                        | Yes                                      | Yes                            | 50                                         | √                          |
| 17         | 1788                                                               | Yes                                                      | Yes                                                                        | Yes                                      | Yes                            | 18                                         | √                          |
| 18         | 2000                                                               | Unsure                                                   | No                                                                         | No                                       | Yes                            | 38                                         | x                          |
| 19         | 2000                                                               | Yes                                                      | Yes                                                                        | Yes                                      | Yes                            | 20                                         | √                          |
| 20         | 4473                                                               | Unsure                                                   | No                                                                         | Yes                                      | Yes                            | 46                                         | x                          |
| 21         | 1149                                                               | Unsure                                                   | No                                                                         | No                                       | No                             | 77                                         | x                          |
| 22         | 5521                                                               | Yes                                                      | Yes                                                                        | Yes                                      | Yes                            | 33                                         | √                          |
| 23         | 1840                                                               | Unsure                                                   | No                                                                         | No                                       | No                             | 42                                         | x                          |
| 24         | 2500                                                               | No                                                       | Yes                                                                        | Yes                                      | Yes                            | 28                                         | x                          |
| 25         | 3400                                                               | Unsure                                                   | No                                                                         | Yes                                      | Yes                            | 32                                         | x                          |
| 26         | 3200                                                               | Yes                                                      | Yes                                                                        | Yes                                      | Yes                            | 28                                         | √                          |
| 27         | 1800                                                               | Unsure                                                   | No                                                                         | Yes                                      | Yes                            | 34                                         | x                          |
| 28         | 4000                                                               | Yes                                                      | Yes                                                                        | Yes                                      | Yes                            | 30                                         | √                          |
| 29         | 2582                                                               | Yes                                                      | Yes                                                                        | Yes                                      | Yes                            | 26                                         | √                          |
| 30         | 5720                                                               | Yes                                                      | Yes                                                                        | Yes                                      | Yes                            | 28                                         | √                          |
| 31         | 3100                                                               | Yes                                                      | Yes                                                                        | Yes                                      | Yes                            | 55                                         | √                          |
| 32         | 2686                                                               | Yes                                                      | Yes                                                                        | Yes                                      | Yes                            | 32                                         | √                          |
| 33         | 1000                                                               | Yes                                                      | Yes                                                                        | Yes                                      | Yes                            | 51                                         | √                          |
| 34         | 4000                                                               | Unsure                                                   | No                                                                         | Yes                                      | Yes                            | 14                                         | x                          |
